# Supplementary material for: Highly Effective Flame-Retardant Rigid Polyurethane Foams: Fabrication and Applications in Inhibition of Coal Combustion
Source: MDPI journal article supplement (doi:10.3390/polym11111776), 2019-10-29
Supplement: s1 [file s1]

# Supplementary Information for

## Highly Effective Flame-Retardant Rigid Polyurethane Foams: Fabrication and Applications in Inhibition of Coal Combustion

Liancong Wang <sup>1,5,†</sup>, Benjamin Tawiah <sup>3,†</sup>, Yongqian Shi <sup>2,\*</sup>, Suncheng Cai <sup>2</sup>, Xiaohui Rao <sup>2</sup>, Chuan Liu <sup>2</sup>, Ye Yang <sup>2</sup>, Fuqiang Yang <sup>2</sup>, Bin Yu <sup>4,\*</sup>, Yuntao Liang <sup>5,\*</sup> and Libi Fu <sup>6</sup>

<sup>1</sup> State Key Laboratory of Fire Science, University of Science and Technology of China, 96 Jinzhai Road, Hefei 230026, China; wangliancong-0829@163.com

<sup>2</sup> College of Environment and Resources, Fuzhou University, 2 Xueyuan Road, Fuzhou 350116, China; dandy\_cai@163.com (S.C.); Rxh123456789m88@163.com (X.R.); liuchuanll@163.com (C.L.); ys19750873@163.com (Y.Y.); fqouyang82@163.com (F.Y.)

<sup>3</sup> Institute of Textiles and Clothing, Hong Kong Polytechnic University, Hong Kong 999077, China; tawiahb@gmail.com

<sup>4</sup> Centre for Future Materials, University of Southern Queensland, Toowoomba QLD 4350, Australia

<sup>5</sup> State Key Laboratory of Coal Mine Safety Technology, CCTEG Shenyang Research Institute, Fushun 113122, China

<sup>6</sup> College of Civil Engineering, Fuzhou University, 2 Xueyuan Road, Fuzhou 350116, China; fulibi@fzu.edu.cn

<sup>†</sup> These authors contributed equally to this work (co-first author)

<sup>\*</sup> Corresponding authors: shiyq1986@fzu.edu.cn (Y.S.); ahu07yb@gmail.com (B.Y.); liangyt@fscrci.com (Y.L.)

Received: 29 September 2019; Accepted: 24 October 2019; Published: date

## Additional Supporting Data

**Table S1.** The vertical burning data of RPUF and its composites.

| Sample No. | UL-94     |                  |        |
|------------|-----------|------------------|--------|
|            | t1/t2 (s) | Absorbent cotton | Rating |
| RPUF-1     | —         | NC               | NR     |
| RPUF-2     | 2.4/1.5   | NC               | V-0    |
| RPUF-3     | 1.7/3.7   | NC               | V-0    |
| RPUF-4     | 1.7/4.0   | NC               | V-0    |
| RPUF-5     | 2.1/0.0   | NC               | V-0    |
| RPUF-6     | 1.0/0.0   | NC               | V-0    |
| RPUF-7     | 25.5/0.0  | NC               | V-1    |

Note: NC indicates no combustion; NR means no rating.

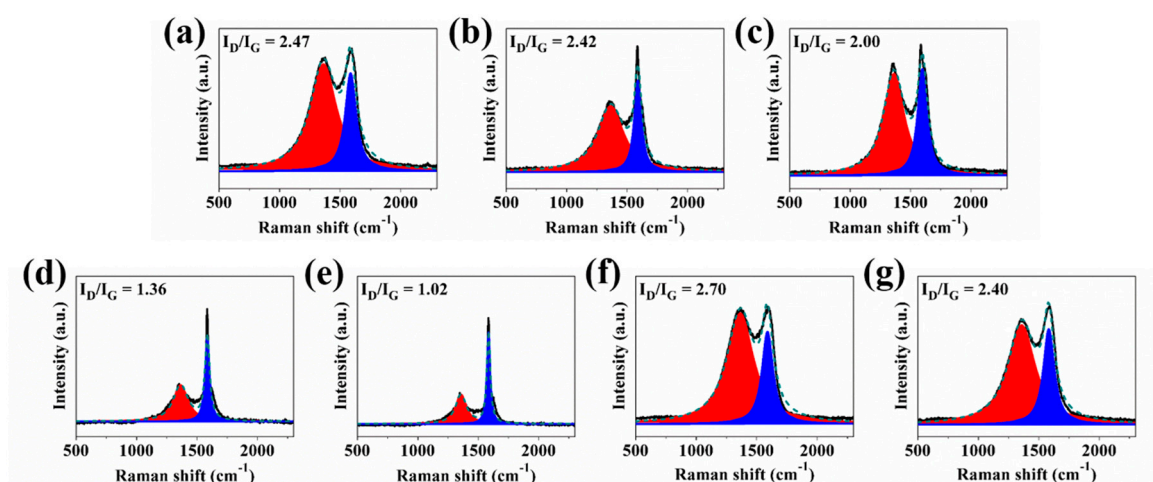

**Figure S1.** Raman spectra of external char residues of (a) RPUF-1, (b) RPUF-2, (c) RPUF-3, (d) RPUF-4, (e) RPUF-5, (f) RPUF-6, and (g) RPUF-7 after cone calorimeter testing.

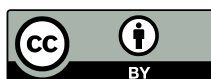

© 2019 by the authors. Submitted for possible open access publication under the terms and conditions of the Creative Commons Attribution (CC BY) license (<http://creativecommons.org/licenses/by/4.0/>).
